# Supplementary material for: Quantum anomalous Hall effect in a two-dimensional ferromagnetic NpF monolayer with high Curie temperature
Source: Royal Society of Chemistry journal article supplement (doi:10.1039/d5cp02271a), 2025-12-16
Supplement: d5cp02271a1.pdf [file d5cp02271a1.pdf]

## **Supplementary Materials**

### **Quantum Anomalous Hall Effect in Two-dimensional Ferromagnetic NpF Monolayer with High Curie Temperature**

Yuqing Mao, Jie Li, Xiaokang Xu, Xinghao Chang, Yuxuan Liu, Xiuyun Zhang,\* Ailei He\*

*College of Physics Science and Technology, Yangzhou University, Yangzhou 225002, China.*

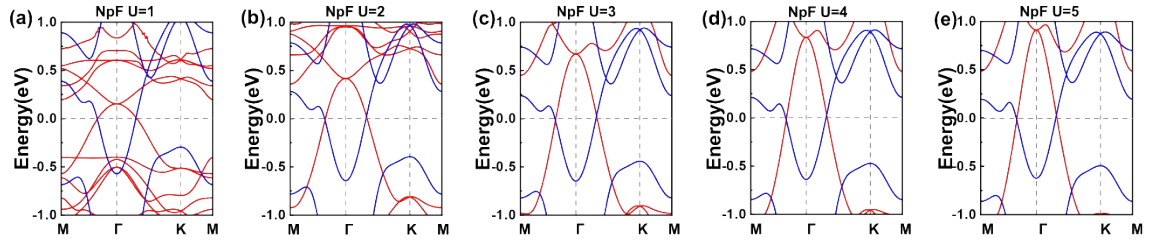

Fig. S1. (a) - (e) Band structures of the NpF monolayer with different  $U_{\text{eff}}$ .

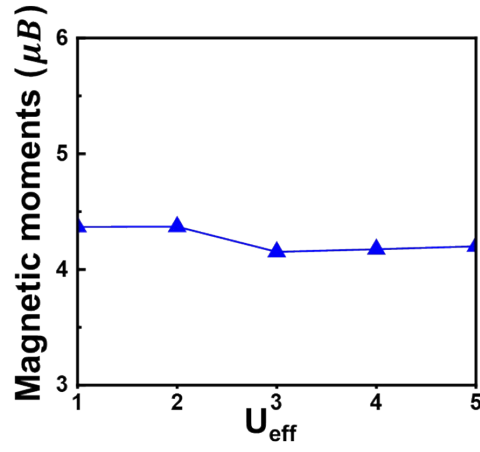

Fig. S2. Magnetic moments of the NpF monolayer with different  $U_{\text{eff}}$ .

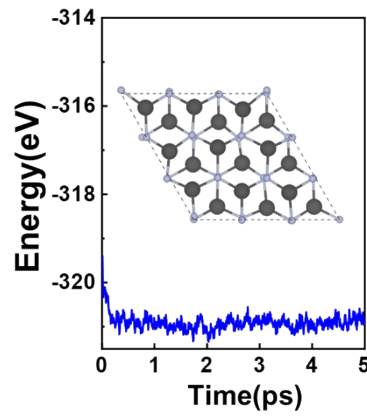

Fig. S3. The snapshots of  $3 \times 3 \times 1$  supercell of NpF monolayer after AIMD simulations of 5 ps at 300K.

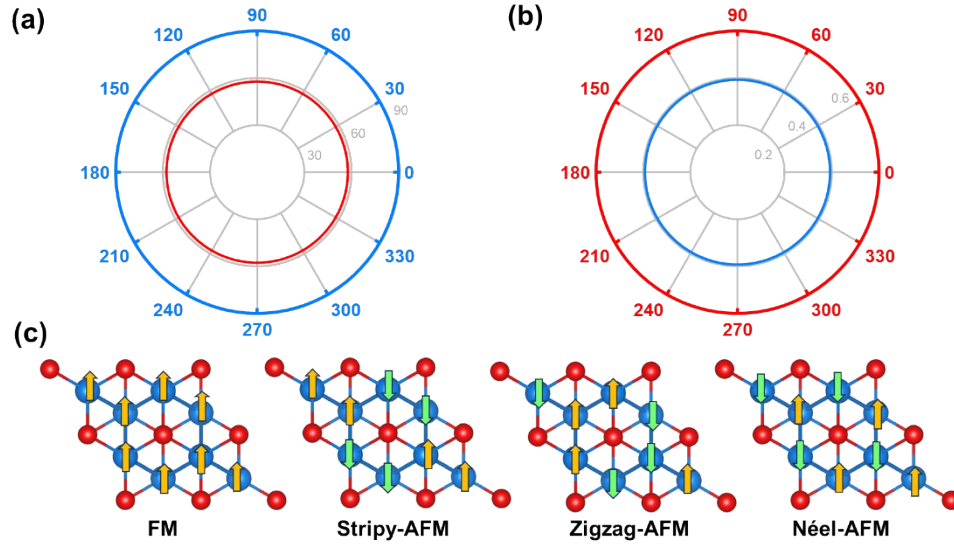

Fig. S4. (a) The polar diagrams of (b) Young's modulus  $E(\varphi)$  (N/m) and (c) Poisson ratio  $\nu(\varphi)$  as a function of the azimuthal angle  $\varphi$ . (c) The four different magnetic configurations of NpF monolayer.

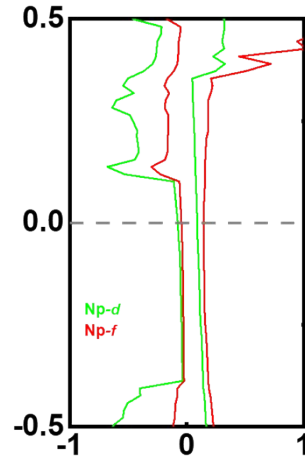

Fig. S5. The orbital-projected density of state of NpF monolayer.

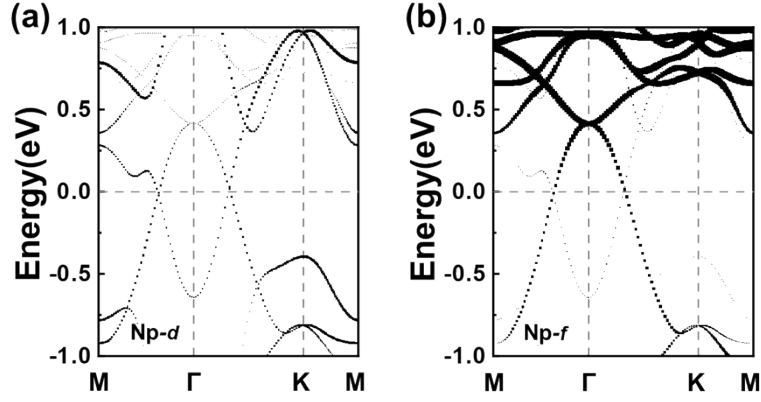

Fig. S6. The orbitals projection band structures for NpF monolayer.

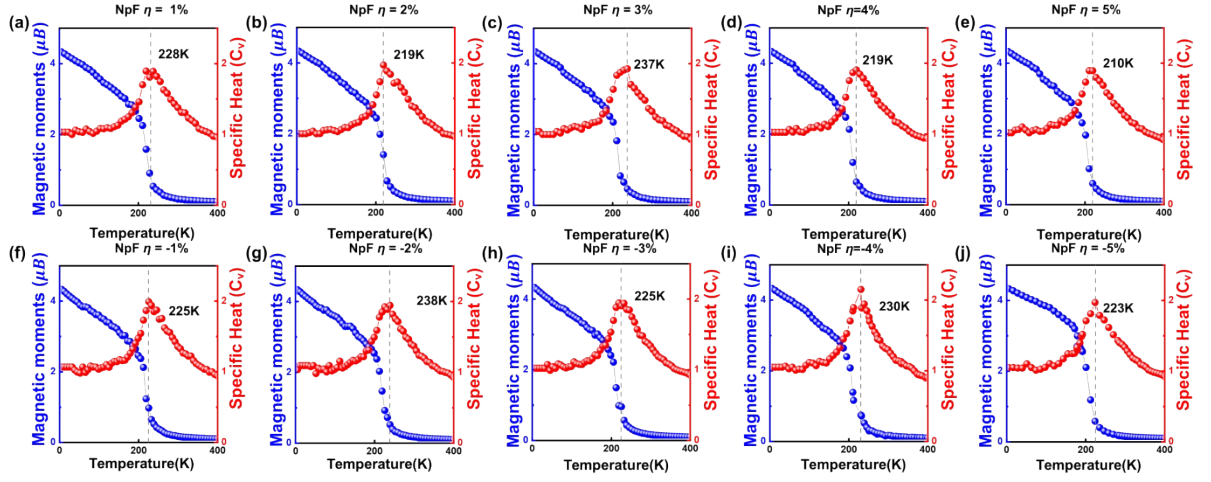

Fig. S7. Magnetic moment ( $\mu_B$ ) and heat capacity as a function of temperature from Monte Carlo simulation for NpF monolayer under biaxial strains.

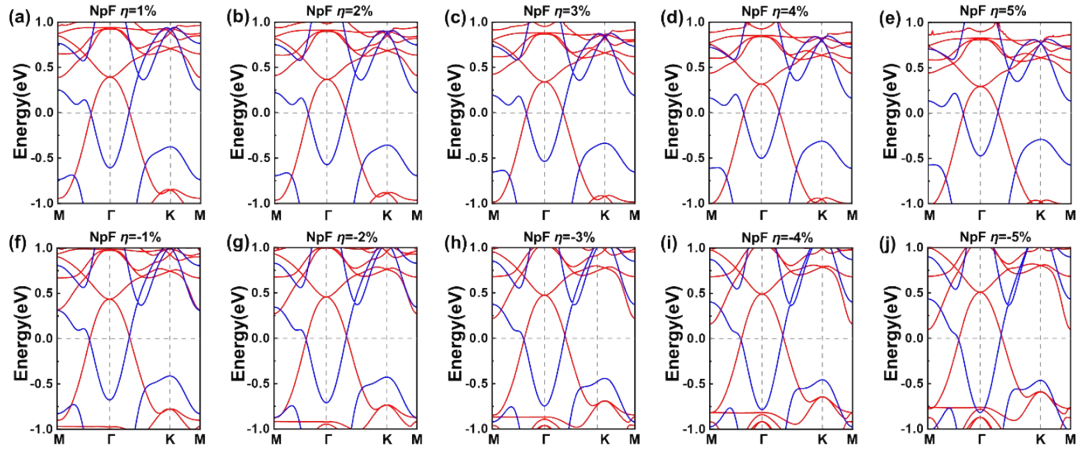

Fig. S8. (a) - (j) Band structures of the NpF monolayer at biaxial strain ( $-5\% \leq \eta \leq 5.0\%$ ) without SOC.
